# Supplementary material for: Automatic detection of diffusion modes within biological membranes using back-propagation neural network
Source: Springer Nature journal article supplement (doi:10.1186/s12859-016-1064-z), 2016-05-04

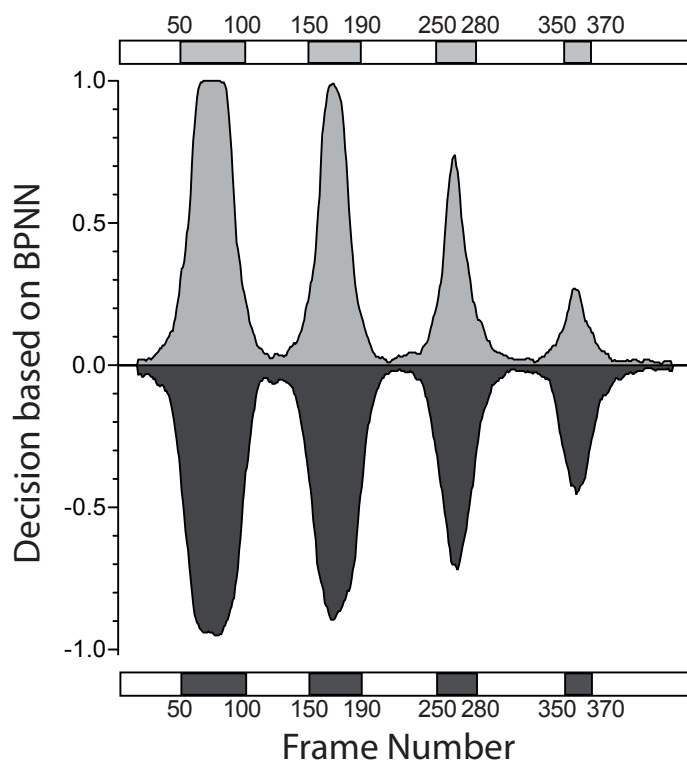

Supplement: 12859_2016_1064_MOESM1_ESM.pdf [file 12859_2016_1064_MOESM1_ESM.pdf]
