# Supplementary material for: Automatic detection of diffusion modes within biological membranes using back-propagation neural network
Source: Springer Nature journal article supplement (doi:10.1186/s12859-016-1064-z), 2016-05-04
Supplement: 12859_2016_1064_MOESM2_ESM.pdf [file 12859_2016_1064_MOESM2_ESM.pdf]

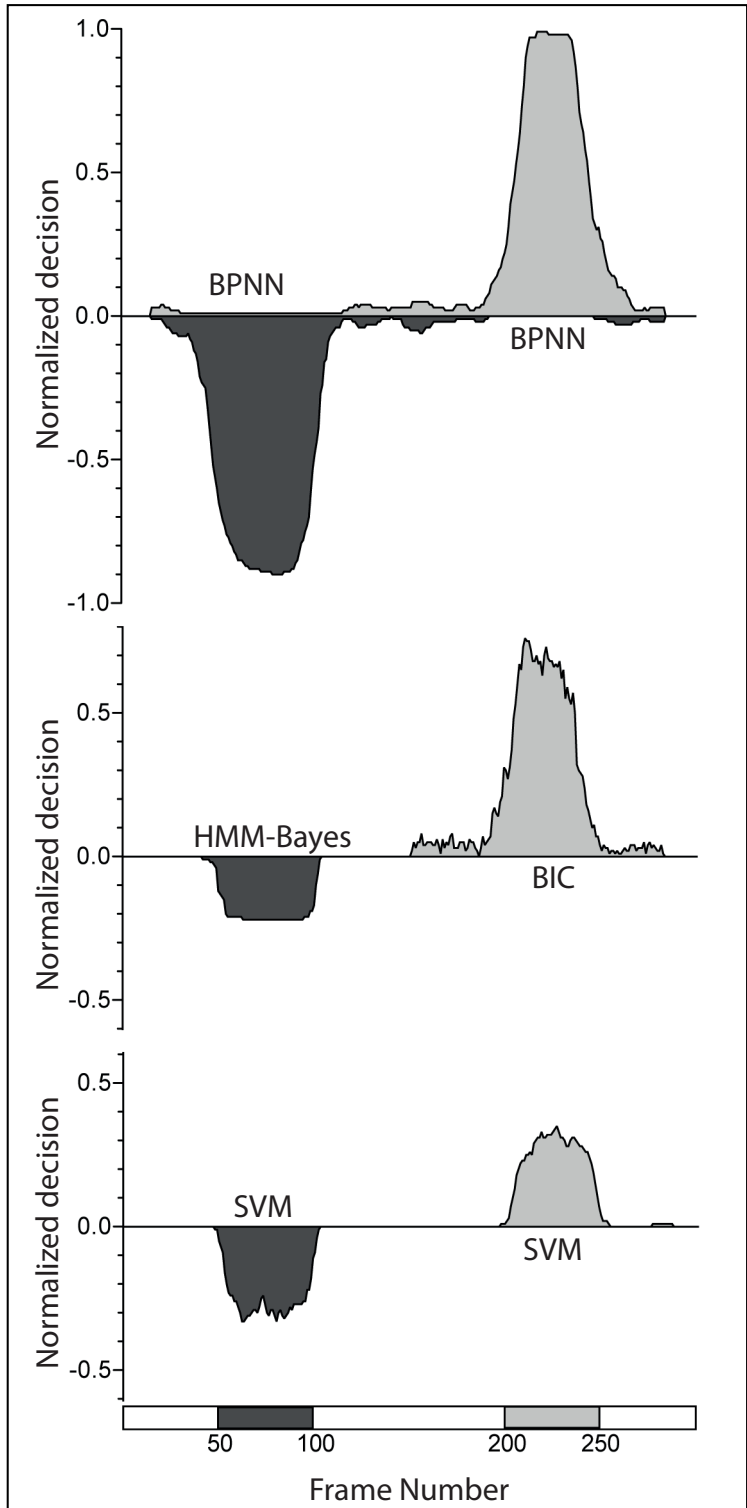

| Directed motion | PaTrack | SVM  | HMM-Bayes |
|-----------------|---------|------|-----------|
| Sensitivity (%) | 83.1    | 26.1 | 20.9      |
| Specificity (%) | 95.4    | 99.9 | 99.5      |
| Confined motion | PaTrack | SVM  | BIC       |
| Sensitivity (%) | 75.3    | 24.5 | 49.9      |
| Specificity (%) | 96.8    | 99.9 | 95,0      |
